# Supplementary material for: Cross-protection induced by highly conserved human B, CD4+, and CD8+ T-cell epitopes-based vaccine against severe infection, disease, and death caused by multiple SARS-CoV-2 variants of concern
Source: PubMed Central journal article supplement (PMC10839970; doi:10.3389/fimmu.2024.1328905), 2024-01-22
Supplement: DataSheet_1.pdf [file DataSheet_1.pdf]

## Supplementary Material

### Table of Content

| <b>Serial Number</b> | <b>Supplementary Material</b> | <b>Page</b> |
|----------------------|-------------------------------|-------------|
| 1                    | Supplementary Fig. S1         | 2           |
| 2                    | Supplementary Fig. S2         | 3           |
| 3                    | Supplementary Fig. S3         | 4           |
| 4                    | Supplementary Fig. S4         | 5           |

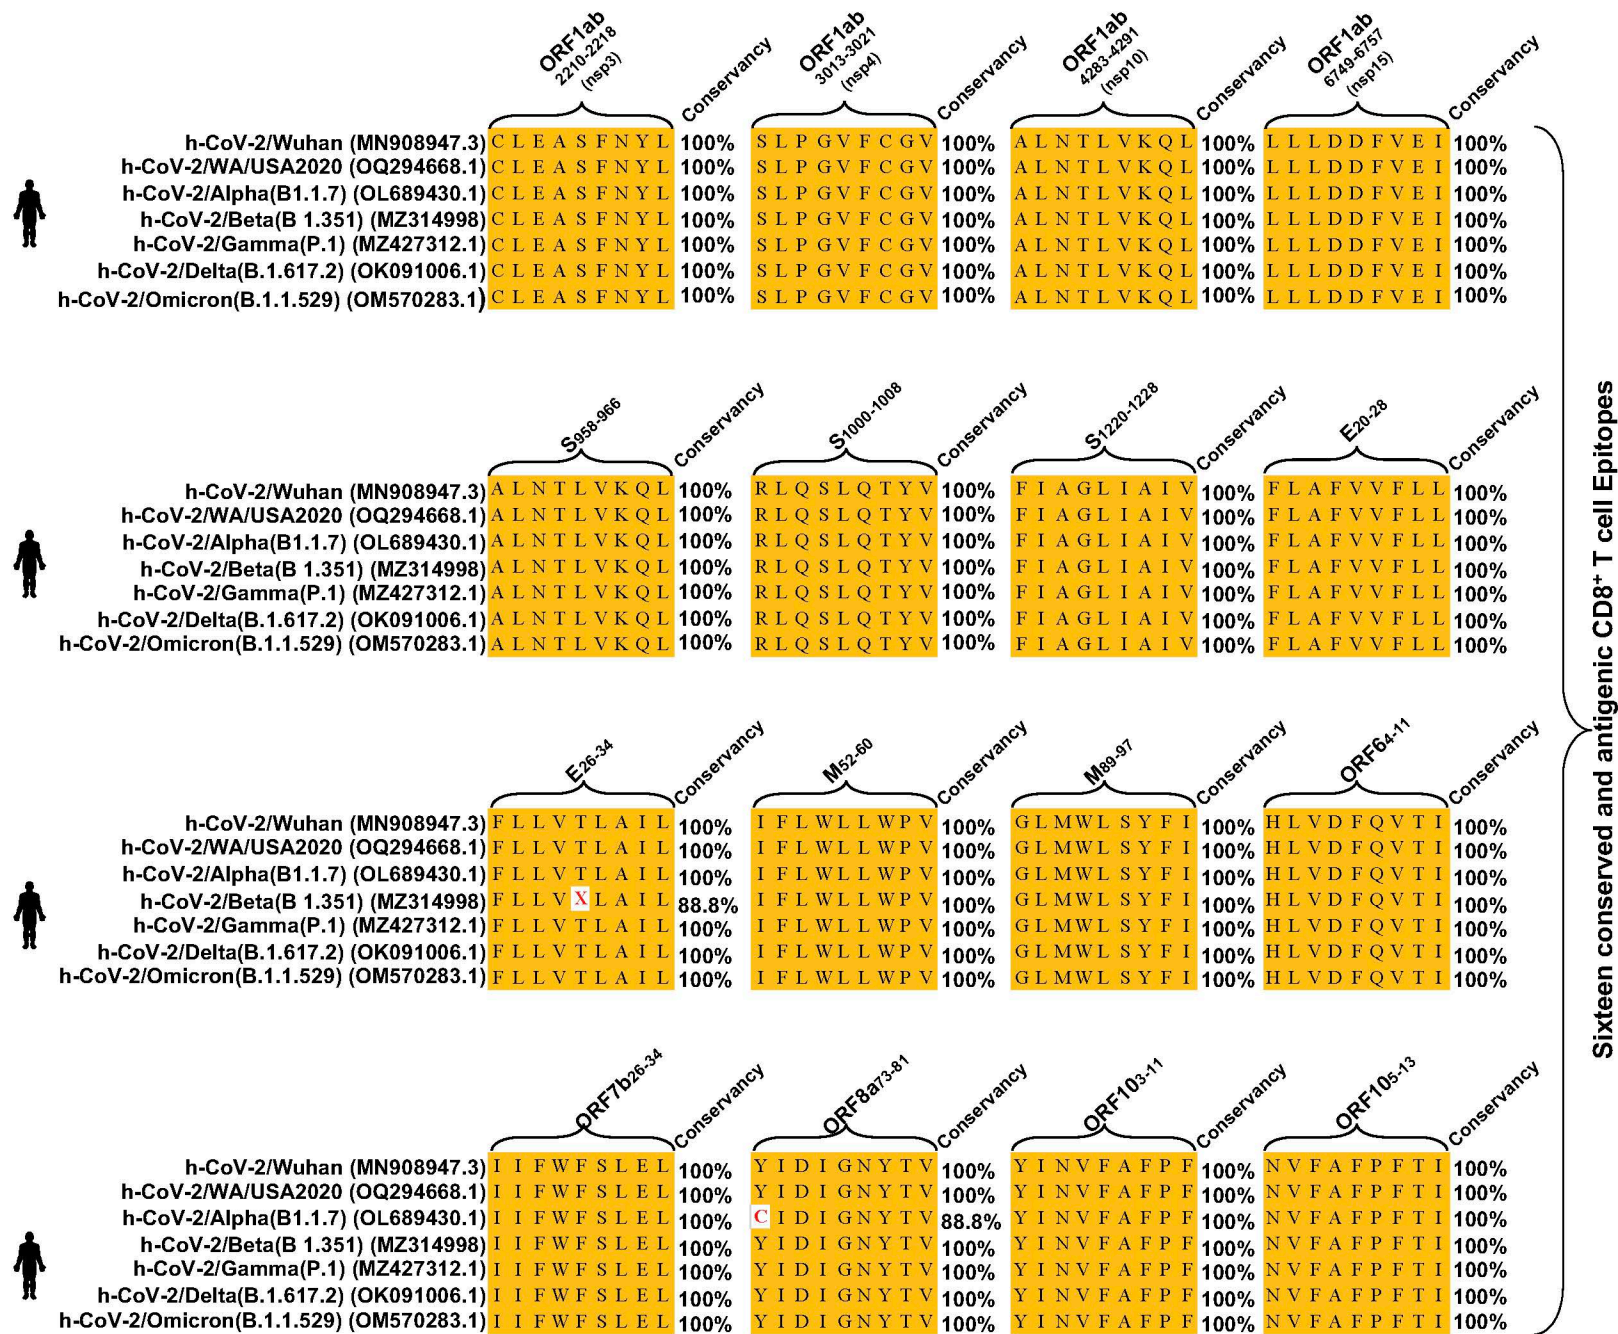

**Supplementary Figure S1. Sequence homology analysis to identify the degree of the conservancy of the immunodominant CD8<sup>+</sup> T cell epitopes among SARS-CoV-2 VOCs:** Sequence homology data for the CD8<sup>+</sup> T cell epitopes is shown. The 16 epitopes, found to be highly immunodominant against SARS-CoV-2 variants of concern WA/USA2020, Alpha (B.1.1.7), Beta (B.1.351), Gamma (P.1), Delta (B.1.617.2), and Omicron (B.1.1.529) were subjected to the sequence homology analysis.



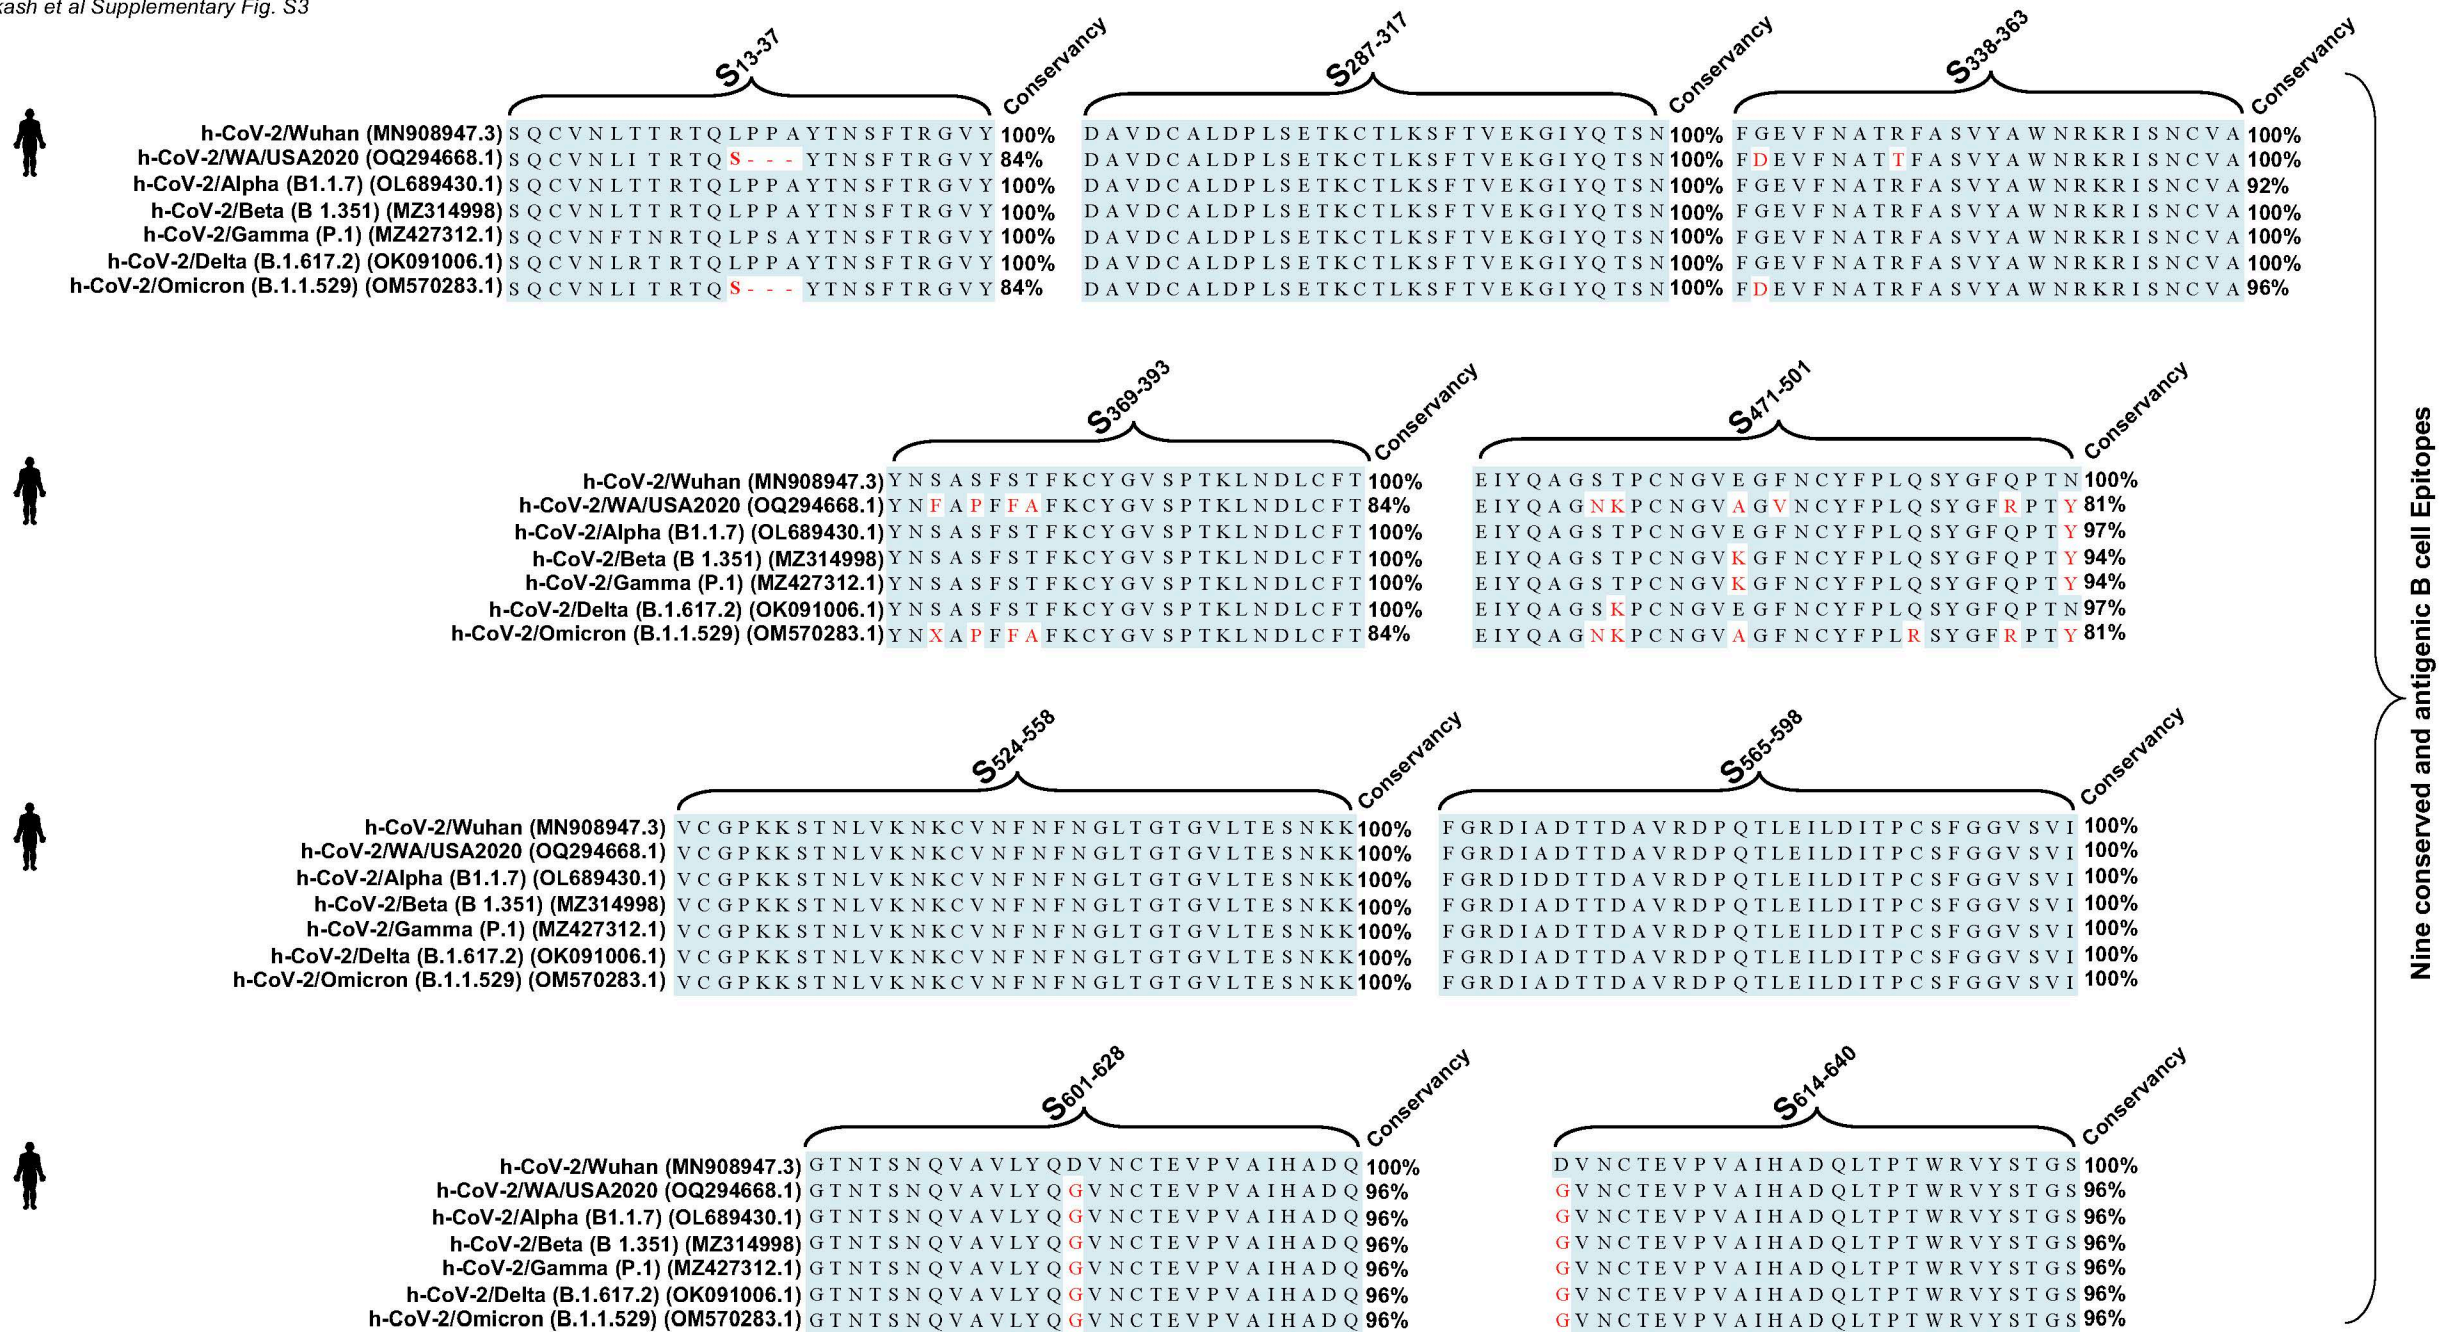

**Supplementary Figure S3.** Sequence homology analysis to identify the degree of the conservancy of the immunodominant B cell epitopes among SARS-CoV-2 variants of concern: The sequence homology data for the B cell epitopes are shown. The 9 epitopes, found to be highly immunodominant against SARS-CoV-VOCs WA/USA2020, Alpha (B.1.1.7), Beta (B.1.351), Gamma (P.1), Delta (B.1.617.2), and Omicron (B.1.1.529) were subjected to the sequence homology analysis.

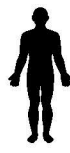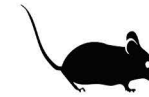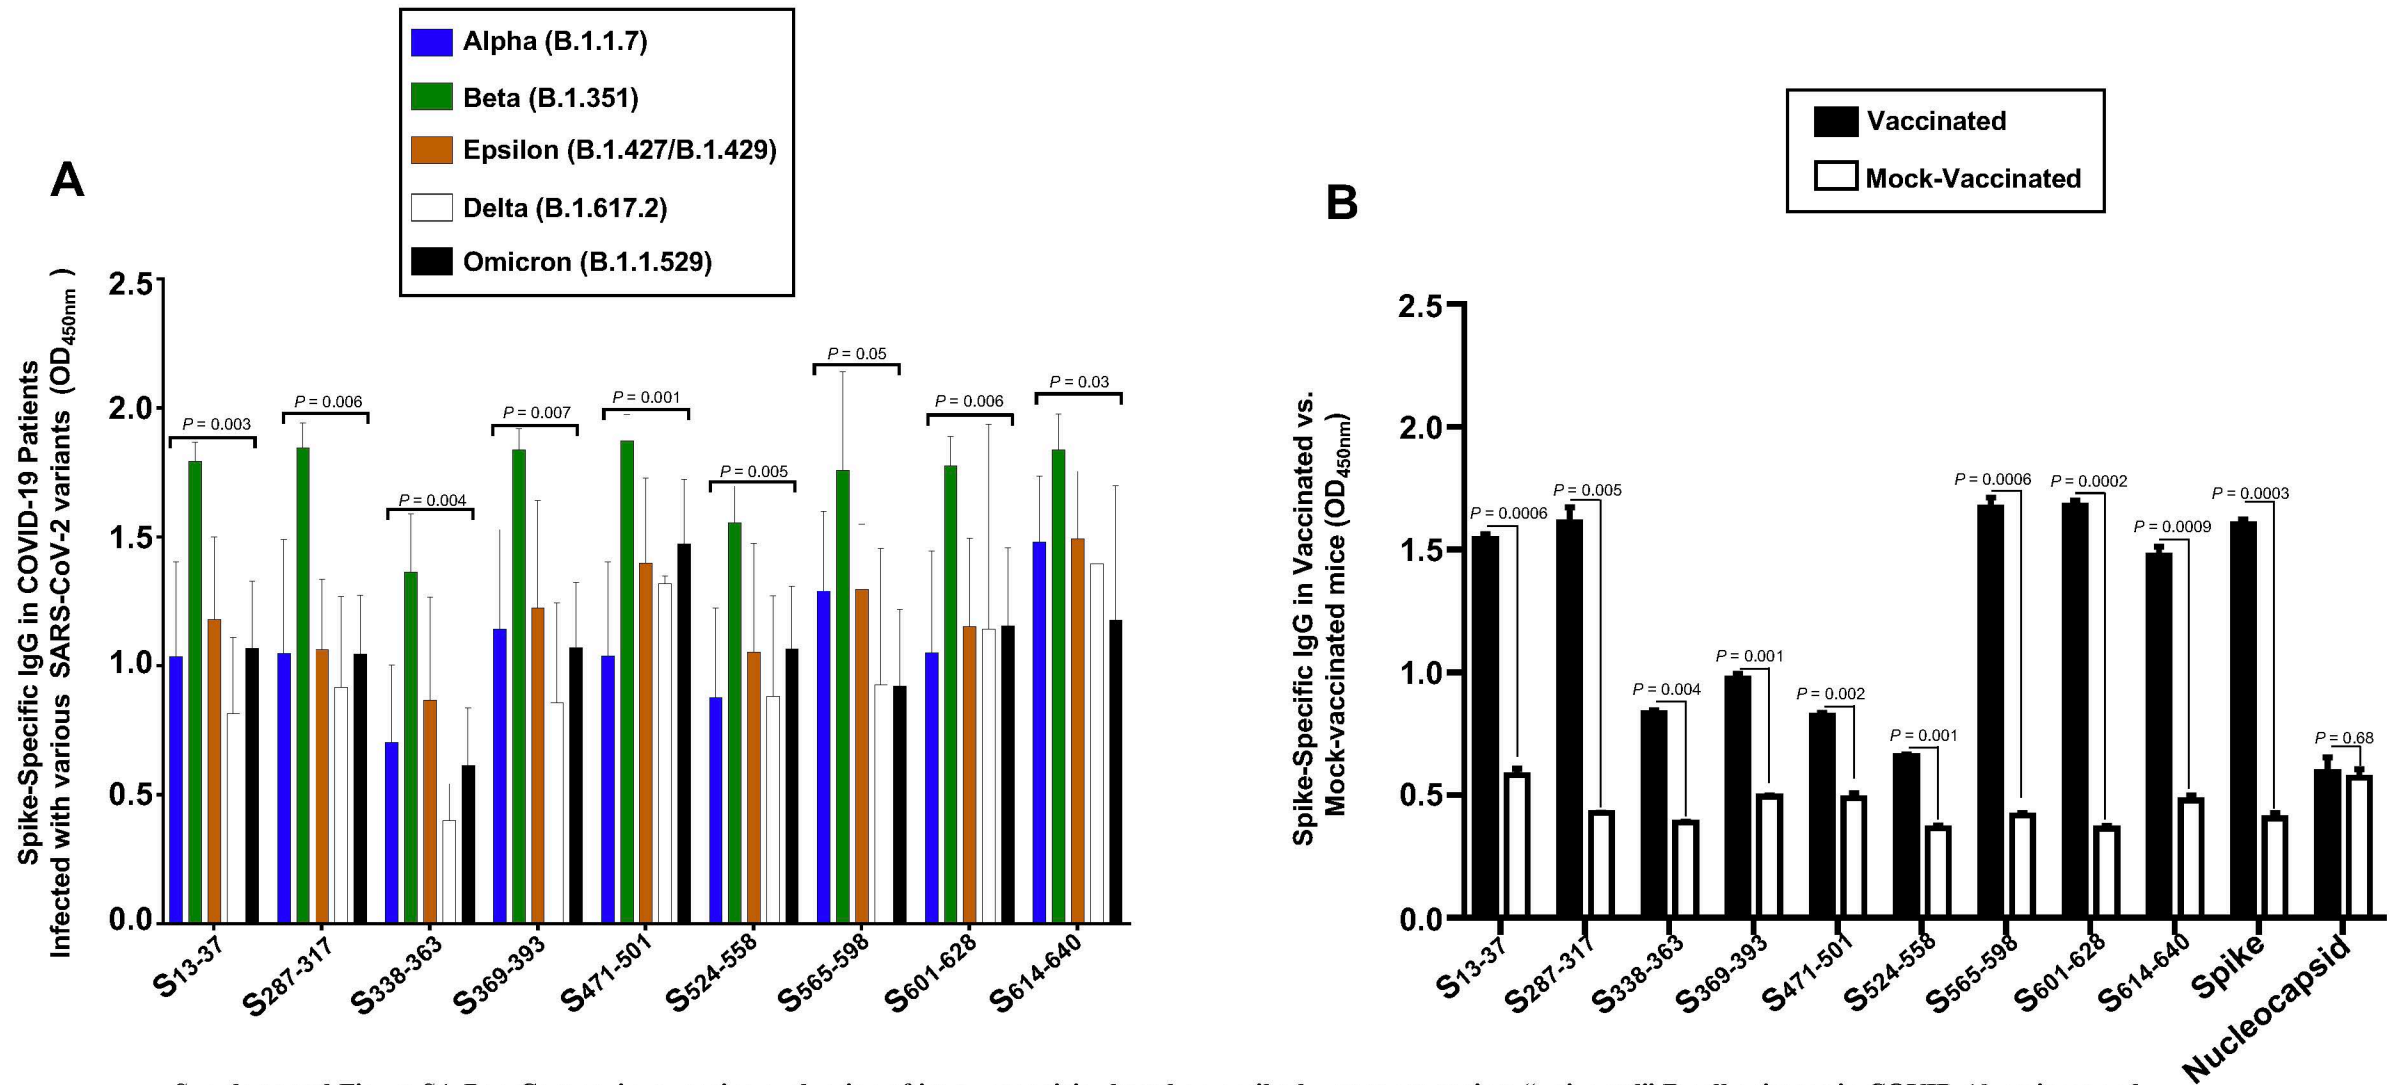

**Supplemental Figure S4.** Pan-Coronavirus vaccine evaluation of immunogenicity based on antibody response against “universal” B-cell epitopes in COVID-19 patients and triple transgenic HLA-A\*02:01/HLA-DRB1\*01:01-hACE-2 exposed to different SARS-CoV-2 variants of concern: Bar graphs show the peptide binding IgG level for the 9 “universal” B cell epitopes (A) among COVID-19 patients screened to be infected with SARS-CoV-2 variants of concern Alpha (B.1.1.7), Beta (B.1.351), Epsilon (B.1.427/B.1.429), Delta (B.1.617.2), and Omicron (B.1.1.529) and (B) in vaccinated versus mock-vaccinated triple transgenic HLA-A\*02:01/HLA-DRB1\*01:01-hACE-2 mice. Bars represent means  $\pm$  SEM. Data were analyzed by student's *t*-test and multiple *t*-tests. Results were considered statistically significant at  $P < 0.05$ . Statistical correction for multiple comparisons was applied using the Holm-Sidak method.
